# Supplementary material for: A fitness trade-off between seasons causes multigenerational cycles in phenotype and population size
Source: eLife journal article supplement (doi:10.7554/elife.18770), 2017-02-06
Supplement: supp [file elife-18770-supp-v1.zip]

Archive with 3 entries (3 files):
- elife_poa_e18770_Appendix_1_figure_1.pdf
- elife_poa_e18770_Appendix_2_figure_1.pdf
- elife_poa_e18770_Appendix_3_figure_1.pdf
